# Supplementary material for: Chlorotoxin Fused to IgG-Fc Inhibits Glioblastoma Cell Motility via Receptor-Mediated Endocytosis
Source: PubMed Central journal article supplement (PMC3523153; doi:10.1155/2012/975763), 2012-12-05
Supplement: 975763.f1.pdf [file 975763.f1.pdf]

604 **Supplemental Figures**

605

606 **Figure S1**

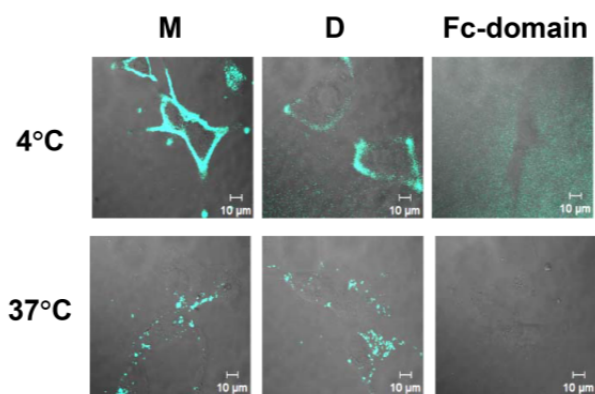

607

608

609 **Figure S2**

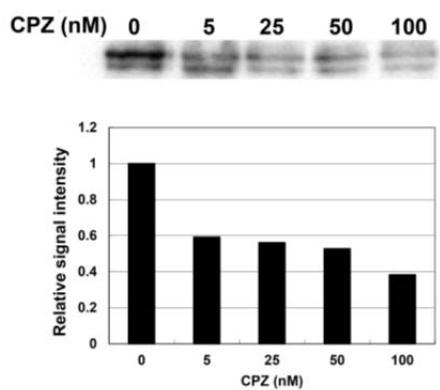

610

611
